# Supplementary material for: Hybrid nano-microstructured and bioinspired conductive hydrogels with tunable multifunctionality
Source: Royal Society of Chemistry journal article supplement (doi:10.1039/d4tc04064c), 2024-10-28
Supplement: d4tc04064c1.pdf [file d4tc04064c1.pdf]

*Supplementary Information for*

Hybrid nano-microstructured and bioinspired  
conductive hydrogels with tunable  
multifunctionality

Manting Wang,<sup>abc</sup> Jiaqi Zhang,<sup>ab</sup> Yaoyi Guo,<sup>ab</sup> Xiaoyong Zhou,<sup>c</sup> Jie-Xin Wang<sup>ab</sup> and Yuan Le<sup>\*ab</sup>

<sup>a</sup>State Key Laboratory of Organic-Inorganic Composites, Beijing University of Chemical  
Technology, Beijing 100029, PR China;

<sup>b</sup>Research Center of the Ministry of Education for High Gravity Engineering and Technology,  
Beijing University of Chemical Technology, Beijing 100029, PR China;

<sup>c</sup>Zhejiang Juhua Co.,Ltd, Zhejiang 323000, PR China.

\*Correspondence to leyuan@mail.buct.edu.cn (Y. Le)

# **S1. Effects of the content of PNIPAM MGs, Ag NWs and PDA chains on the mechanical properties of AgPMP hydrogels**

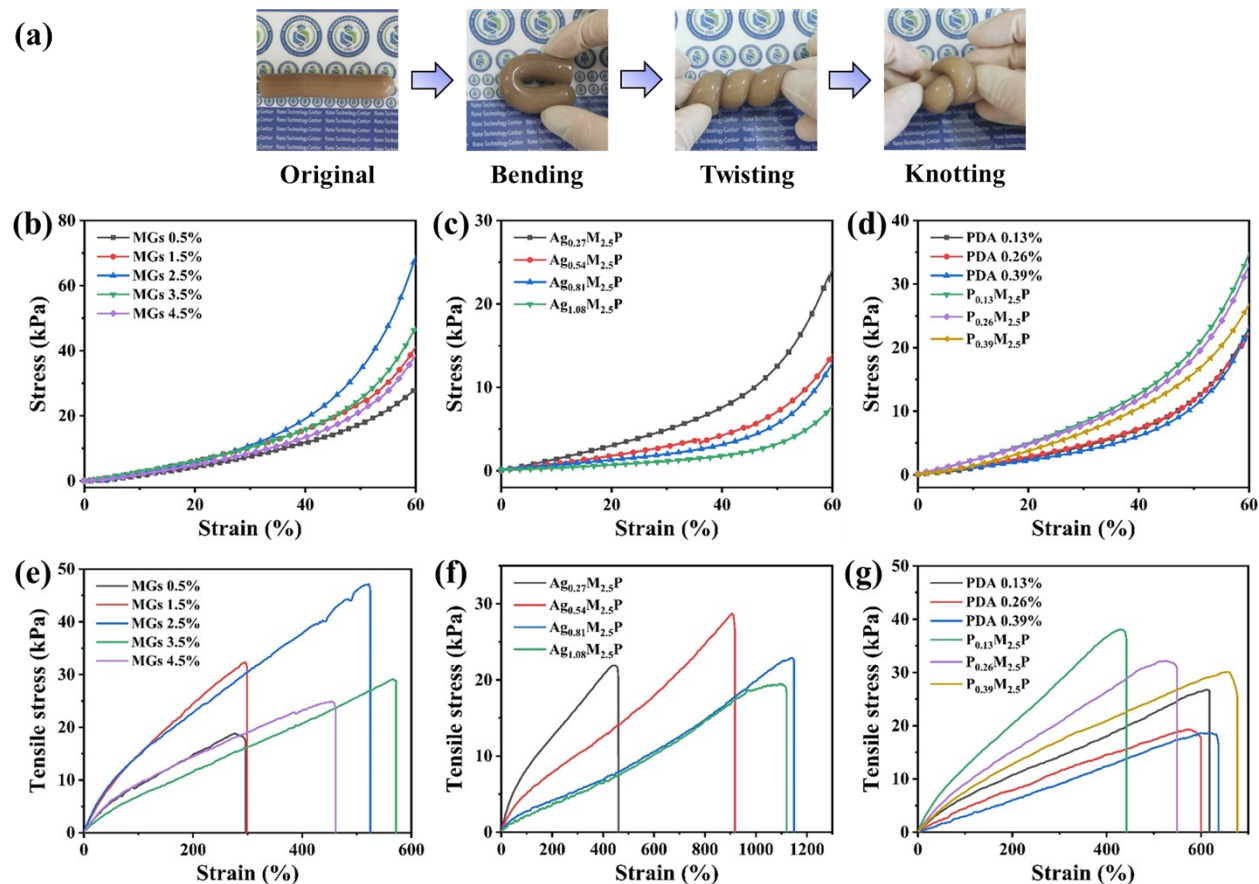

**Figure S1.** (a) The original, bending, twisting and knotting shapes of  $\text{Ag}_{0.27}\text{P}_{0.13}\text{M}_{2.5}\text{P}$  hydrogel. The compression stress-strain curves of (b) MP hydrogels with different MGs/NIPAM ratios, (c) AgMP hydrogels with different Ag/NIPAM ratios, as well as (d) PP hydrogels and PMP hydrogels with different PDA/NIPAM ratios. The tensile stress-strain curves of (e) MP hydrogels with different MGs/NIPAM ratios, (f) AgMP hydrogels with different Ag/NIPAM ratios, as well as (g) PP hydrogels and PMP hydrogels with different PDA/NIPAM ratios.

## S2. Effect of PDA content on the photothermal conversion performance of AgPMP hydrogel

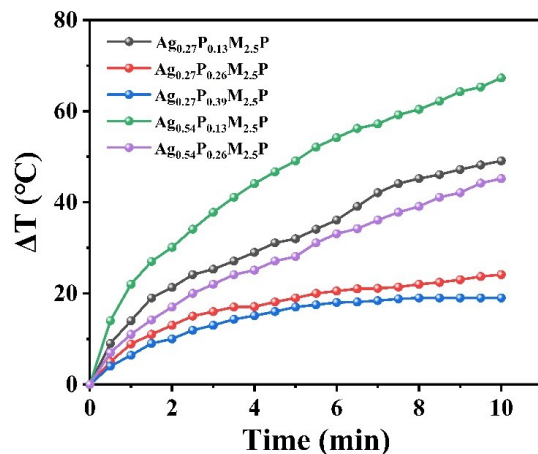

**Figure S2.** Temperature changes of AgPMP hydrogels with different PDA/NIPAM ratios.

## S3. Effects of usage amount and Ag NWs content of AgPMP hydrogel on antibacterial activity

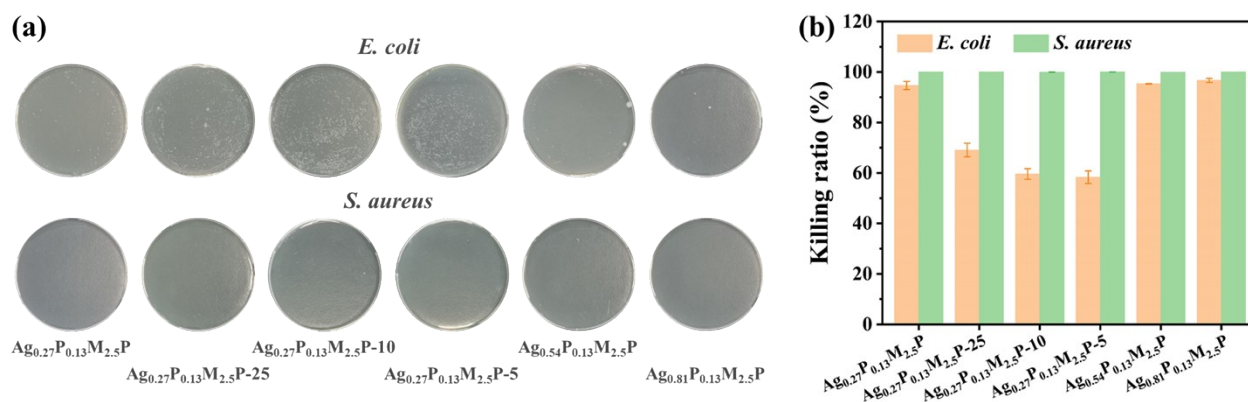

**Figure S3.** (a) Images of bacterial colonies formed by *E. coli* and *S. aureus* after treating with 50, 25, 10, 5 mg  $\text{Ag}_{0.27}\text{P}_{0.13}\text{M}_{2.5}\text{P}$ , and  $\text{Ag}_{0.54}\text{P}_{0.13}\text{M}_{2.5}\text{P}$  as well as  $\text{Ag}_{0.81}\text{P}_{0.13}\text{M}_{2.5}\text{P}$  hydrogels. (b) The corresponding bacterial-killing efficiency against *E. coli* and *S. aureus*.

#### S4. The photothermal antibacterial activity of AgPMP hydrogels

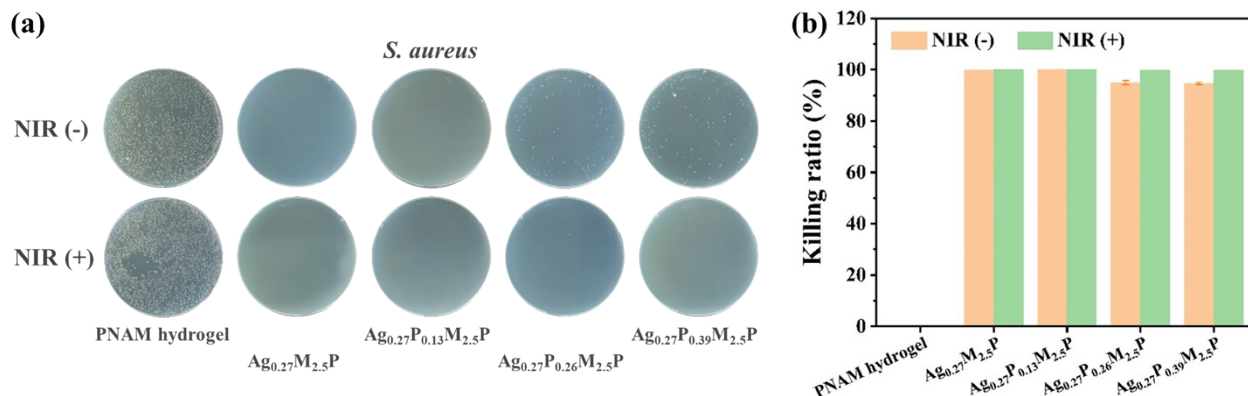

**Figure S4.** (a) Images of bacterial colonies formed by *S. aureus* after treating with 10 mg PNAM hydrogel,  $\text{Ag}_{0.27}\text{M}_{2.5}\text{P}$  hydrogel and AgPMP hydrogels with different PDA/NIPAM ratios under NIR irradiation and NIR non-irradiation, respectively. (b) The corresponding bacteria-killing efficiency against *S. aureus*.

#### S5. The photothermal antibacterial activity of AgPMP hydrogels

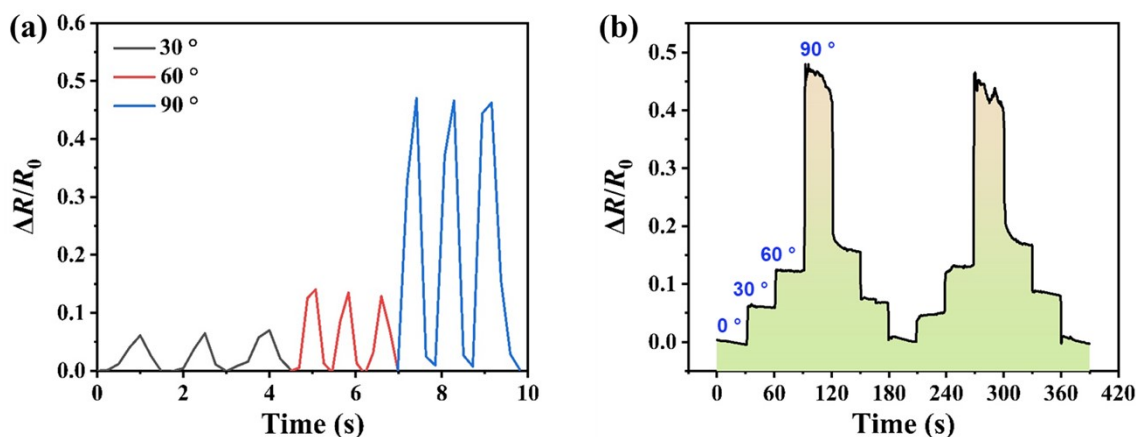

**Figure S5.** (a) The real-time detection of human motions when  $\text{Ag}_{0.54}\text{M}_{2.5}\text{P}$  hydrogel adhered to finger. (b) Relative resistance changes of  $\text{Ag}_{0.54}\text{M}_{2.5}\text{P}$  hydrogel adhered to finger to a stepwise bending cycle.
